# Supplementary material for: The enzymes LSD1 and Set1A cooperate with the viral protein HBx to establish an active hepatitis B viral chromatin state
Source: PubMed Central journal article supplement (PMC4865824; doi:10.1038/srep25901), 2016-05-13

# **The histone demethylase LSD1 and the viral protein HBx cooperate to establish an active hepatitis B viral chromatin state**

**Valentina Alarcón<sup>1</sup>, Sergio Hernández<sup>2</sup>, Lorena Rubio<sup>1</sup>, Francisca Alvarez<sup>1</sup>, Yvo Flores<sup>1</sup>, Manuel Varas-Godoy<sup>3</sup>, Giancarlo V. De Ferrari<sup>4</sup>, Michael Kann<sup>5,6,7</sup>, Rodrigo A. Villanueva<sup>2\*</sup>, and Alejandra Loyola<sup>1,8\*</sup>**

<sup>1</sup>Fundación Ciencia & Vida, 7780272, Santiago, Chile.

<sup>2</sup>Laboratorio de Virus Hepatitis, Departamento de Ciencias Biológicas, Facultad de Ciencias Biológicas, Universidad Andres Bello, Santiago, Chile.

<sup>3</sup>Centro de Investigación Biomédica, Facultad de Medicina, Universidad de los Andes, Santiago, Chile.

<sup>4</sup>Centro de Investigaciones Biomédicas. Facultad de Ciencias Biológicas y Facultad de Medicina. Universidad Andres Bello, Santiago, Chile.

<sup>5</sup>Univ. de Bordeaux, Microbiologie Fondamentale et Pathogénicité, UMR 5234, Bordeaux, France.

<sup>6</sup>CNRS, Microbiologie Fondamentale et Pathogénicité, UMR 5234, Bordeaux, France.

<sup>7</sup>CHU de Bordeaux, Bordeaux, France.

<sup>8</sup>Universidad San Sebastián, Santiago, Chile.

\*To whom correspondence should be addressed.

Tel: (562) 27703408; Email: rodrigo.villanueva@unab.cl

Tel: (562) 23672048; Fax: (562) 22372259; Email: [aloyola@cienciavida.org](mailto:aloyola@cienciavida.org)

**Supplementary Figure 1.** (A) Pargyline does not affect viability. Cellular viability after treatment was determined by trypan blue staining. The results are shown as % of living cells. The standard deviation was determined from three independent experiments. (B) Specificity of LSD1 DNA association. Human hepatocarcinoma Huh7 cells were transfected with a plasmid encoding a Flag-tagged LSD1. Chromatin Immunoprecipitation (ChIP) analysis was performed using Flag-beads or IgG-beads as a negative control. Immunoprecipitated DNA was quantified by qPCR using the commercially available human negative control primer (Active Motif, catalogue number #71001) and the human positive control primer set ACTB-2 (Active Motif, catalogue number #71001), as detailed in Material and Methods. The results are expressed as % of input. The standard deviation was obtained from three independent experiments.

# Supplementary Figure 1

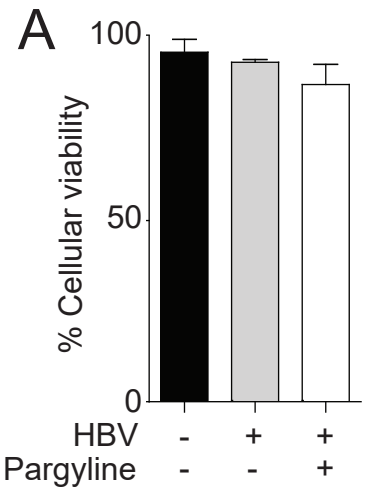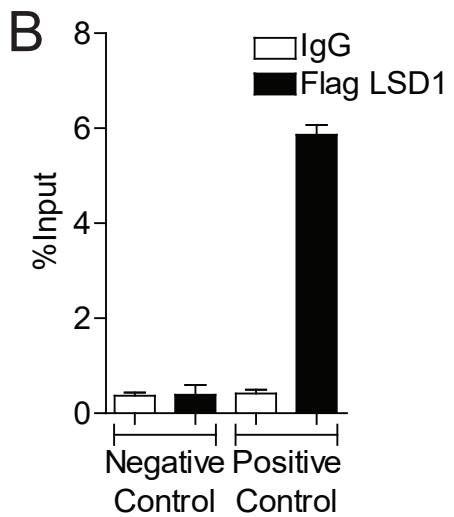

Supplement: srep25901-s1.pdf [file srep25901-s1.pdf]
